# Supplementary material for: Mesoporous carbon nitride supported 5,10,15,20-tetrakis(4-methoxyphenyl)-21H,23H-porphine cobalt(ii) as a selective and durable electrocatalyst for the production of hydrogen peroxide via two-electron oxygen reduction
Source: Royal Society of Chemistry journal article supplement (doi:10.1039/d0cy01801e), 2020-11-26
Supplement: d0cy01801e1.pdf [file d0cy01801e1.pdf]

*Electronic supplementary information (ESI)*

**Mesoporous carbon nitride supported 5,10,15,20-tetrakis(4-methoxyphenyl)-  
21H,23H-porphine cobalt(II) as a selective and durable electrocatalyst for the production  
of hydrogen peroxide *via* two-electron oxygen reduction**

**Devesh Kumar Singh, Vellaichamy Ganesan,\* Dharmendra Kumar Yadav, Mamta Yadav,  
Piyush Kumar Sonkar, and Rupali Gupta**

Department of Chemistry, Institute of Science, Banaras Hindu University

Varanasi-221 005, UP, India

Telephone: +91-542-2307321; Fax : +91-542-2368127

E-mail: [velganesh@yahoo.com](mailto:velganesh@yahoo.com) and [velgan@bhu.ac.in](mailto:velgan@bhu.ac.in)

\* Corresponding author

### **Synthesis of mesoporous carbon (MPC) and CoTMPP integrated MPC**

Mesoporous carbon was synthesized using similar experimental as used for the MCN synthesis. Sucrose was used as the carbon source and an equal amount of carbon content was maintained in the precursor as that used in the synthesis of MCN.

### **Experimental details for ICPE measurements**

An accurately weighed amount of CoTMPP@MCN is treated with concentrated  $\text{HNO}_3$ . This process leaches out CoTMPP from the CoTMPP@MCN into the solution. Assuming a complete dissolution of CoTMPP into the solution, the solution obtained after filtration is used as the working solution for the ICPE measurements. For ICPE measurement after the stability test, the material was scratched out from the working electrode (indium tin oxide coated quartz plate for this current experiment) and used after the above treatment with concentrated  $\text{HNO}_3$ .

### **Determination of electrochemically active surface area (ECSA)**

Cyclic voltammetry (CV) response for the GC/CoTMPP@MCN and GC/MCN electrodes were recorded at different scan rates (20, 40, 60, 80, 100, 120, 140, 160, 180, 200 mV/s). The potential range is chosen in the region, where there is no faradic process and charging of the double layer is the only possible process. From the CV measurements, a plot between anodic current (at 0.92 V (vs. RHE)) and scan rate is made and the slope of this plot gives the value of double layer capacitance ( $C_{dl}$ ). The ECSA of the modified electrodes were obtained using the relation S1

$$\text{ECSA} = C_{dl} (\text{modified electrode}) / C_{dl} (\text{GC}) \quad \text{S1}$$

$C_{dl}$  for bare glassy carbon (GC) electrode is found to have values in the range of 20 - 60  $\mu\text{Fcm}^{-2}$  per  $\text{cm}^2$  of ECSA.<sup>S1,S2</sup> In the present calculation, 60  $\mu\text{Fcm}^{-2}$  per  $\text{cm}^2$  of ECSA as  $C_{dl}$  of plane GC is used.

### **Determination of the roughness factor**

The roughness factor of the electrode is the ratio of ECSA to the geometrical surface area of the electrode. Roughness factor values for modified electrodes were calculated and tabulated in Table S1

### **Determination of faradic efficiency of $\text{H}_2\text{O}_2$ formation**

Faradic efficiency (FE) was determined based on the charge consumed and the actual amount of  $\text{H}_2\text{O}_2$  produced. The charge consumed was obtained directly from the amperometric data and the amount of  $\text{H}_2\text{O}_2$  produced was measured using the volumetric titration method.

### **Titration procedure**

The amperometric analysis was carried out at an applied potential of 0.043 and 0.50 V (vs. RHE) in 0.1 M  $\text{HClO}_4$  and 0.1 M KOH respectively, for 3600 s. At an interval of 1200 s, 1.0 mL of the electrolyte was taken and 1.0 mL of KI solution (2 wt%) was added. In the resulting mixture, 1.0 mL of 3.5 M  $\text{H}_2\text{SO}_4$  and 50  $\mu\text{L}$  of molybdate indicator (prepared by mixing 0.5 g ammonium molybdate and 1.5 g of ammonium nitrate in 5 mL of 6 M  $\text{NH}_4\text{OH}$  and making up to 25 mL by water) was added and titrated against 1.0 mM sodium thiosulphate solution. The calculated faradic efficiencies are tabulated below (Table S2).

### Calculation of turn over frequency (TOF)

The number of active sites on the electrodes was calculated using a reported procedure.<sup>S3</sup> Briefly, the CV response of GC/CoTMPP@MCN was recorded in nitrogen saturated 0.1 M KOH solution. The potential range is chosen in such a way that in the selected region no catalysis occurs (0.87 to 1.27 V *vs.* RHE). The CV response (Figure S6) is integrated to calculate the charge consumed and the number of active sites (n) is calculated using equation S2.

$$n = \frac{Q}{2F} \quad \dots(S2)$$

Then the TOF was calculated based on the amount of H<sub>2</sub>O<sub>2</sub> produced (equation S3, Table S3).

$$\text{TOF} = \frac{\text{amount of H}_2\text{O}_2 \text{ produced } (\frac{\text{mol}}{\text{s}})}{\text{number of active sites (mol)}} \quad \dots(S3)$$

**Table S1.** Number of electrons involved in the ORR at CoTMPP@MCN, CoTMPP@MPC, and CoTPP@MCN in both acidic and basic media at different potentials.

| Material   | Number of electrons (n) (Potential) |                          |
|------------|-------------------------------------|--------------------------|
|            | 0.1 M KOH                           | 0.1 M HClO <sub>4</sub>  |
| CoTMPP@MCN | <b>n= 1.8</b> (0.37 V)              | <b>n= 1.9</b> (-0.032 V) |
|            | <b>n= 1.8</b> (0.39 V)              | <b>n= 2.1</b> (-0.042 V) |
|            | <b>n= 1.9</b> (0.41 V)              | <b>n= 2.1</b> (-0.052 V) |
|            | <b>n= 1.7</b> (0.43 V)              | <b>n= 2.0</b> (-0.062 V) |
|            | <b>n= 2.0</b> (0.45 V)              | <b>n= 2.1</b> (-0.072 V) |
| CoTMPP@MPC | <b>n= 3.4</b> (0.18 V)              | <b>n= 3.3</b> (0.0 V)    |
|            | <b>n= 3.9</b> (0.28 V)              | <b>n= 3.4</b> (-0.1 V)   |
|            | <b>n= 3.5</b> (0.38 V)              | <b>n= 3.5</b> (-0.2 V)   |
|            | <b>n= 3.7</b> (0.48 V)              | <b>n= 3.4</b> (-0.3 V)   |
| CoTPP@MCN  | <b>n= 3.7</b> (0.15 V)              | <b>n= 3.3</b> (0.0 V)    |
|            | <b>n= 3.5</b> (0.25 V)              | <b>n= 3.4</b> (-0.1 V)   |
|            | <b>n= 3.7</b> (0.30 V)              | <b>n= 3.1</b> (-0.2 V)   |
|            | <b>n= 3.4</b> (0.35 V)              | <b>n= 3.3</b> (-0.3 V)   |

**Table S2.** Roughness factor of the modified electrodes

| Electrode     | Roughness factor           |              |
|---------------|----------------------------|--------------|
|               | in 0.1 M HClO <sub>4</sub> | in 0.1 M KOH |
| GC/MCN        | 2.1                        | 3.3          |
| GC/CoTMPP@MCN | 3.6                        | 5.0          |

**Table S3.** Faradic efficiency of CoTMPP@MCN for H<sub>2</sub>O<sub>2</sub> formation.

| Medium                    | Time (s) | Charge consumed (C) | Theoretical H <sub>2</sub> O <sub>2</sub> (μ mole) | Experimentally measured H <sub>2</sub> O <sub>2</sub> (μ mole) | Faradaic efficiency (%) | Average Faradaic efficiency (%) |
|---------------------------|----------|---------------------|----------------------------------------------------|----------------------------------------------------------------|-------------------------|---------------------------------|
| HClO <sub>4</sub> (0.1 M) | 1200     | 0.026               | 0.14                                               | 0.12                                                           | 85.7                    | 87.6                            |
|                           | 2400     | 0.054               | 0.28                                               | 0.24                                                           | 85.7                    |                                 |
|                           | 3600     | 0.068               | 0.35                                               | 0.32                                                           | 91.4                    |                                 |
| KOH (0.1 M)               | 1200     | 0.066               | 0.34                                               | 0.30                                                           | 88.2                    | 89.0                            |
|                           | 2400     | 0.128               | 0.66                                               | 0.58                                                           | 87.8                    |                                 |
|                           | 3600     | 0.172               | 0.89                                               | 0.76                                                           | 91.0                    |                                 |

**Table S4.** Parameters obtained from the best fit Randle's equivalent circuit for the impedance data

| Sample     | <b>R<sub>s</sub> (ohm)</b> | <b>Q<sub>1</sub> (F)</b> | <b>R<sub>ct</sub> (ohm)</b> | <b>Q<sub>2</sub> (F)</b> | <b>R<sub>p</sub> (ohm)</b> |
|------------|----------------------------|--------------------------|-----------------------------|--------------------------|----------------------------|
| MCN        | 90.77                      | 3.81                     | 2328                        | 0.00127                  | $5.6 \times 10^{12}$       |
| CoTMPP@MCN | 95.69                      | 2.11                     | 1610                        | 0.00056                  | $6.0 \times 10^{10}$       |
| CoTMPP     | 91.02                      | 0.8                      | 2004                        | 0.00009                  | 461.2                      |

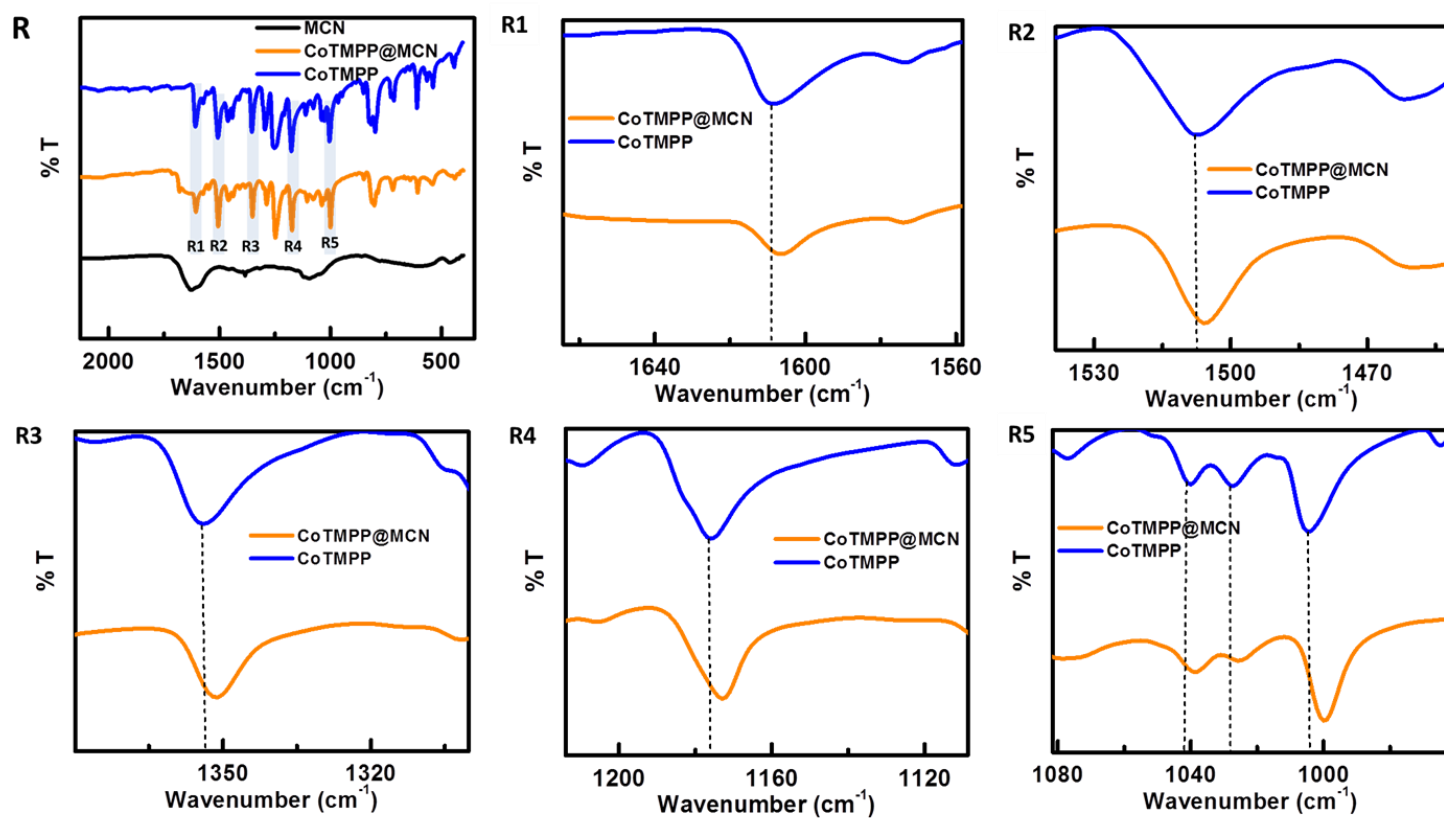

**Figure S1** FT-IR spectra of MCN, CoTMPP@MCN, and CoTMPP (R) with enlarged highlighted regions, R1-R5.

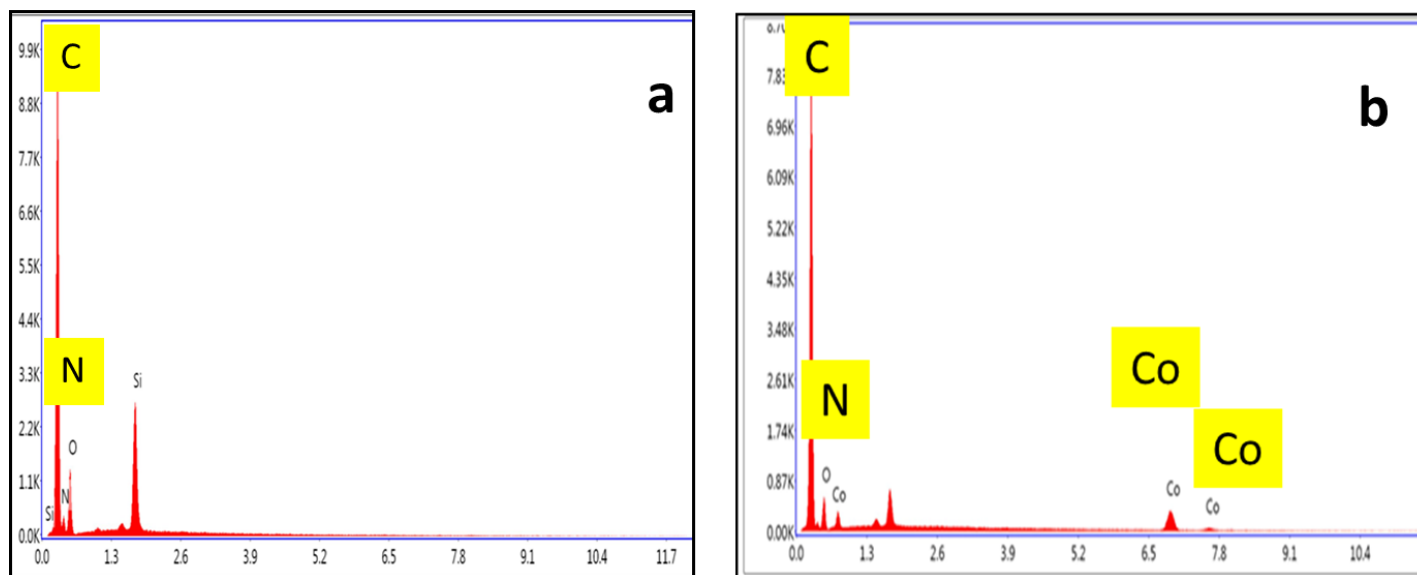

**Figure S2** EDAX spectra of MCN (a) and CoTMPP@MCN (b).

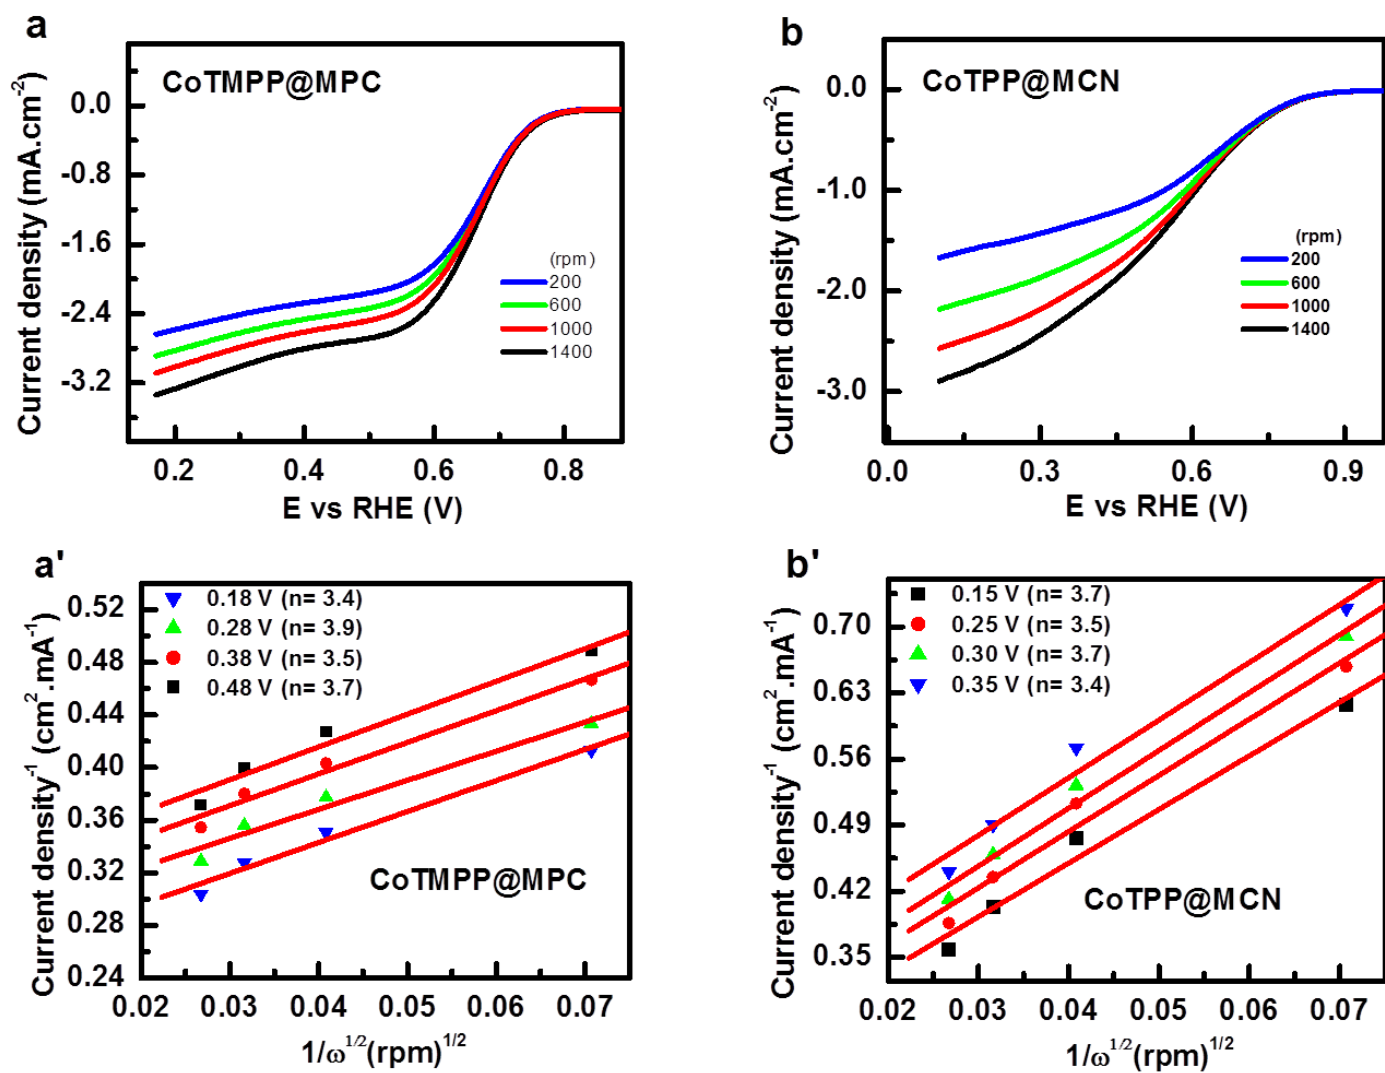

**Figure S3** LSV responses at increasing rotation rate for CoTMPP@MPC (a) and CoTPP@MCN (b) in oxygen saturated 0.1 M KOH. K-L plot derived from the LSV response for CoTMPP@MPC (a') and CoTPP@MCN (b').

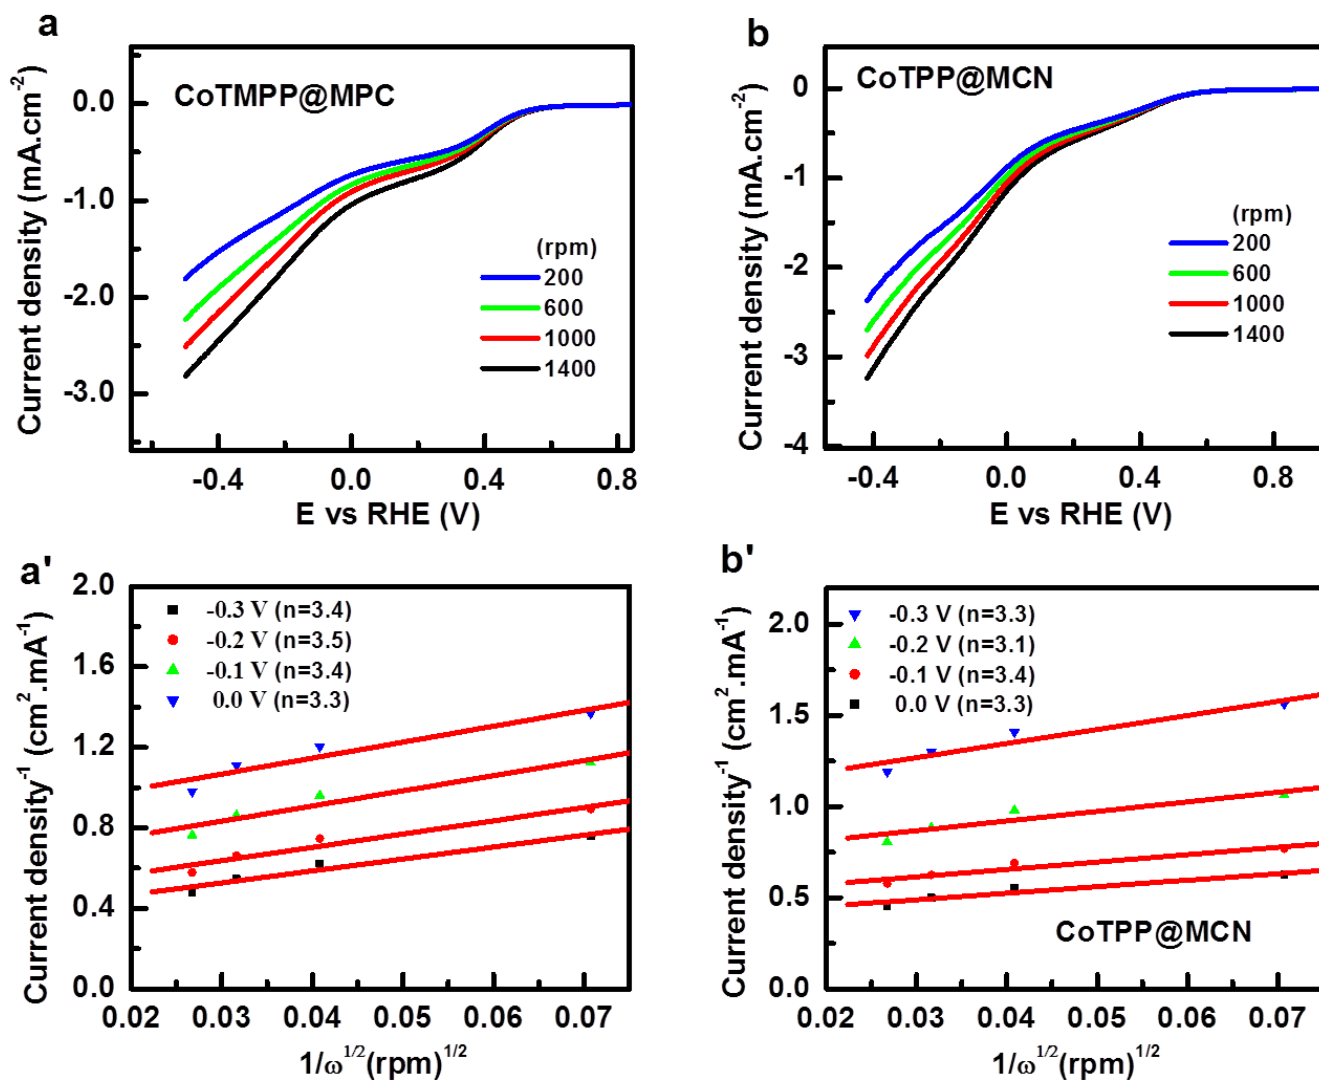

**Figure S4** LSV responses at increasing rotation rate for CoTMPP@MPC (a) and CoTPP@MCN (b) in oxygen saturated 0.1 M HClO<sub>4</sub>. K-L plot derived from the LSV response for CoTMPP@MPC (a') and CoTPP@MCN (b').

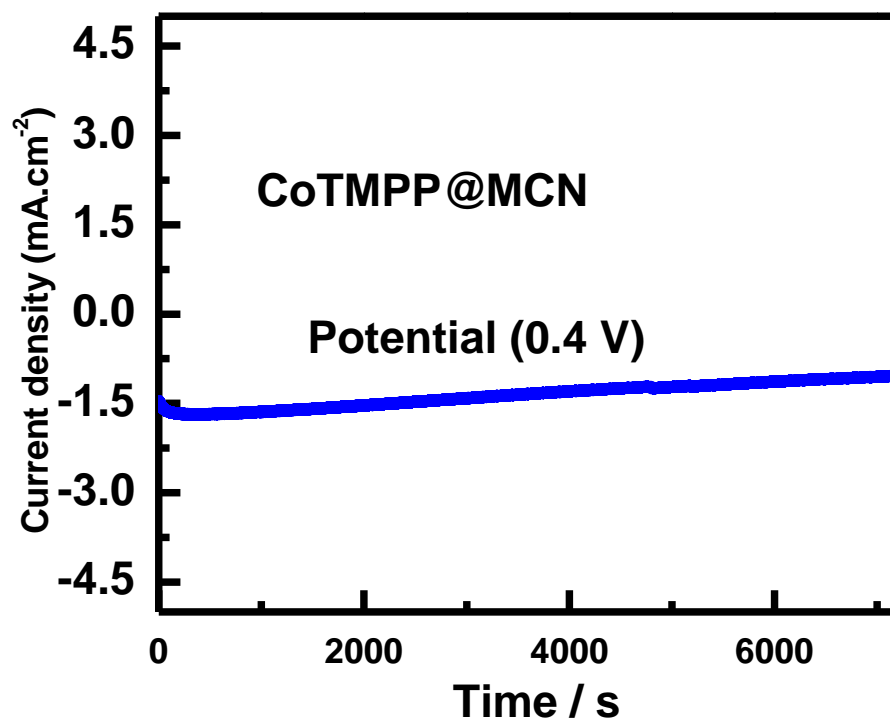

**Figure S5** Amperometric i-t response of GC<sub>RDE</sub>/CoTMPP@MCN in 0.1 M KOH at an applied potential of 0.4 V (vs. RHE) and a rotation rate of 1600 rpm.

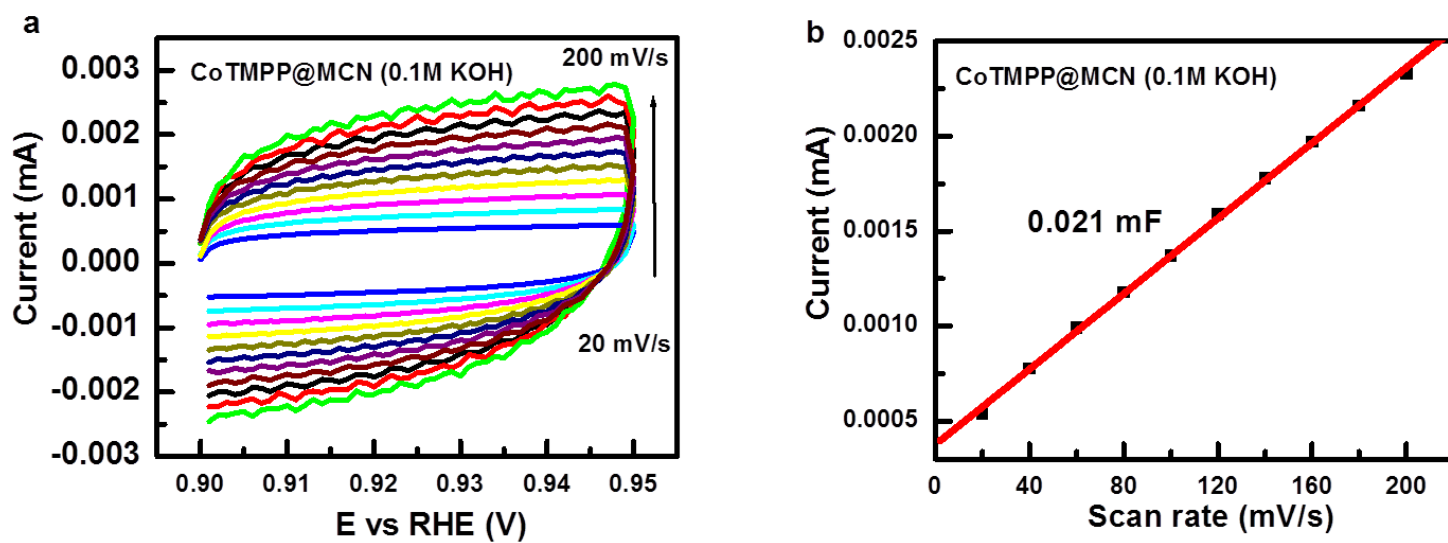

**Figure S6** CV responses of GC/CoTMPP@MCN at different scan rates (a) and the corresponding anodic current vs. scan rate plot (b) before the amperometric analysis.

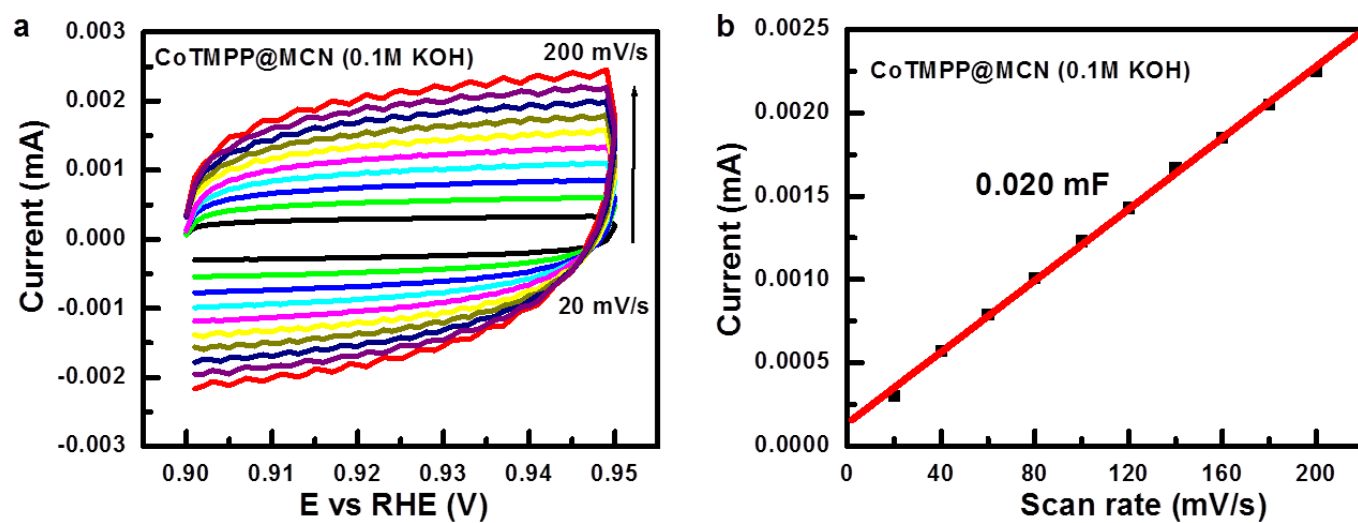

**Figure S7** CV responses of GC/CoTMPP@MCN at different scan rates (a) and the corresponding anodic current vs. scan rate plot (b) after the amperometric analysis.

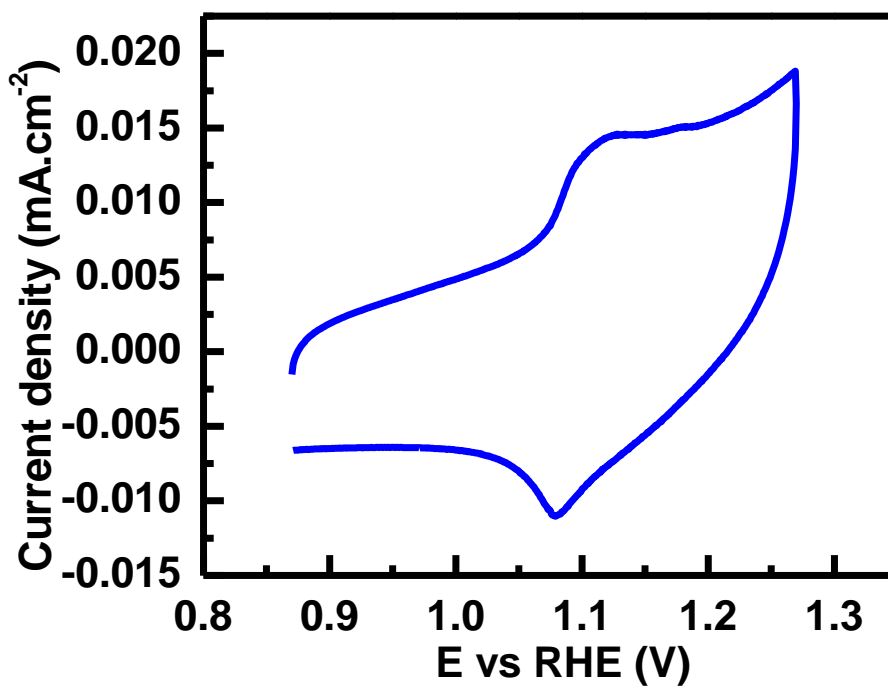

**Figure S8** CV response of GC/CoTMPP@MCN in nitrogen saturated 0.1 M KOH. Scan rate: 300 mVs<sup>-1</sup>

## References

- (S1) H. Deng, C. Zhang, Y. Xie, T. Tumlin, L. Giri, S. P. Karnab, J. Lin, *J. Mater. Chem. A* **2016**, 4, 6824.
- (S2) C. Zhang, Y. Shi, Y. Yu, Y. Du, B. Zhang, *ACS Catal.* **2018**, 8, 8077.
- (S3) S. Anantharaj, S. R. Ede, K. Karthick, S. S. Sankar, K. Sangeetha, P. E. Karthik, S. Kundu, *Energy Environ. Sci.* **2018**, 11, 744.
